# Supplementary material for: Association of Alcohol Consumption With Fat Deposition in a Community-Based Sample of Japanese Men: The Shiga Epidemiological Study of Subclinical Atherosclerosis (SESSA)
Source: PubMed Central journal article supplement (PMC6522392; doi:10.2188/jea.je20170191), 2019-06-05
Supplement: je-29-205-s001.pdf [file je-29-205-s001.pdf]

**eTable 1.** Age-adjusted Pearson's correlation coefficients among obesity indices in 998 men aged 40–79 years (SESSA, Shiga, Japan, 2006–2008)

|                  |                | BMI (kg/m <sup>2</sup> ) | WC (cm)         | WHtR            | WHR <sup>a</sup> | VAT area (cm <sup>2</sup> ) | SAT area (cm <sup>2</sup> ) | TAT area (cm <sup>2</sup> ) | VAT%            |
|------------------|----------------|--------------------------|-----------------|-----------------|------------------|-----------------------------|-----------------------------|-----------------------------|-----------------|
| WC               | Coefficient    | 0.87                     |                 |                 |                  |                             |                             |                             |                 |
|                  | <i>P</i> value | <i>P</i> <0.001          |                 |                 |                  |                             |                             |                             |                 |
| WHtR             | Coefficient    | 0.88                     | 0.94            |                 |                  |                             |                             |                             |                 |
|                  | <i>P</i> value | <i>P</i> <0.001          | <i>P</i> <0.001 |                 |                  |                             |                             |                             |                 |
| WHR <sup>a</sup> | Coefficient    | 0.62                     | 0.83            | 0.84            |                  |                             |                             |                             |                 |
|                  | <i>P</i> value | <i>P</i> <0.001          | <i>P</i> <0.001 | <i>P</i> <0.001 |                  |                             |                             |                             |                 |
| VAT area         | Coefficient    | 0.72                     | 0.77            | 0.75            | 0.67             |                             |                             |                             |                 |
|                  | <i>P</i> value | <i>P</i> <0.001          | <i>P</i> <0.001 | <i>P</i> <0.001 | <i>P</i> <0.001  |                             |                             |                             |                 |
| SAT area         | Coefficient    | 0.82                     | 0.83            | 0.81            | 0.63             | 0.66                        |                             |                             |                 |
|                  | <i>P</i> value | <i>P</i> <0.001          | <i>P</i> <0.001 | <i>P</i> <0.001 | <i>P</i> <0.001  | <i>P</i> <0.001             |                             |                             |                 |
| TAT area         | Coefficient    | 0.84                     | 0.88            | 0.85            | 0.88             | 0.92                        | 0.91                        |                             |                 |
|                  | <i>P</i> value | <i>P</i> <0.001          | <i>P</i> <0.001 | <i>P</i> <0.001 | <i>P</i> <0.001  | <i>P</i> <0.001             | <i>P</i> <0.001             |                             |                 |
| VAT%             | Coefficient    | -0.03                    | 0.04            | 0.03            | 0.13             | 0.47                        | -0.28                       | 0.11                        |                 |
|                  | <i>P</i> value | <i>P</i> =0.309          | <i>P</i> =0.183 | <i>P</i> =0.403 | <i>P</i> <0.001  | <i>P</i> <0.001             | <i>P</i> <0.001             | <i>P</i> <0.001             |                 |
| VSR              | Coefficient    | -0.05                    | 0.02            | 0.01            | 0.12             | 0.45                        | -0.29                       | 0.10                        | 0.97            |
|                  | <i>P</i> value | <i>P</i> =0.122          | <i>P</i> =0.493 | <i>P</i> =0.737 | <i>P</i> <0.001  | <i>P</i> <0.001             | <i>P</i> <0.001             | <i>P</i> =0.002             | <i>P</i> <0.001 |

BMI, body mass index; SAT, abdominal subcutaneous adipose tissue; SESSA, Shiga Epidemiological Study of Subclinical Atherosclerosis; TAT, abdominal total adipose tissue; VAT, abdominal visceral adipose tissue; VAT%, percentage of visceral adipose tissue; VSR, VAT-SAT ratio; WC, waist circumference; WHR, waist-to-hip ratio; WHtR, waist-to-height ratio.

<sup>a</sup> A total of 952 men underwent measurement of hip circumferences.

**eTable 2.** Adjusted mean values<sup>a</sup> of abdominal fat deposition indices according to weekly alcohol consumption in 926 men aged 40–79 years without history of liver disease (SESSA, Shiga, Japan, 2006–2008)

|                             | Categories of weekly alcohol consumption (g/week) |             |             |             |             | Trend <i>P</i> |
|-----------------------------|---------------------------------------------------|-------------|-------------|-------------|-------------|----------------|
|                             | Non-drinkers                                      | 0.1–160.9   | 161–321.9   | 322–482.9   | ≥483        |                |
| n                           | 180                                               | 358         | 205         | 117         | 66          |                |
| VAT area (cm <sup>2</sup> ) | 107.8 (2.8)                                       | 118.1 (2.0) | 122.2 (2.6) | 129.1 (3.5) | 122.9 (4.7) | <0.001         |
| SAT area (cm <sup>2</sup> ) | 121.3 (2.3)                                       | 124.0 (1.6) | 119.3 (2.1) | 120.9 (2.8) | 113.7 (3.7) | 0.100          |
| TAT area (cm <sup>2</sup> ) | 229.1 (4.0)                                       | 242.0 (2.8) | 241.5 (3.7) | 250.0 (4.9) | 236.5 (6.5) | 0.014          |
| VAT%                        | 47.3 (0.7)                                        | 48.3 (0.5)  | 49.9 (0.6)  | 51.3 (0.8)  | 51.5 (1.1)  | <0.001         |
| VSR                         | 0.95 (0.03)                                       | 1.00 (0.02) | 1.05 (0.03) | 1.13 (0.03) | 1.14 (0.05) | <0.001         |
| BMI (kg/m <sup>2</sup> )    | 23.4 (0.2)                                        | 23.5 (0.2)  | 23.5 (0.2)  | 24.1 (0.3)  | 23.5 (0.4)  | 0.364          |
| WC (cm)                     | 84.5 (0.3)                                        | 85.4 (0.2)  | 85.9 (0.3)  | 85.5 (0.4)  | 85.5 (0.5)  | 0.010          |
| WHtR                        | 0.51 (0.00)                                       | 0.51 (0.00) | 0.52 (0.00) | 0.51 (0.00) | 0.51 (0.00) | 0.005          |
| WHR <sup>b</sup>            | 0.92 (0.00)                                       | 0.92 (0.00) | 0.93 (0.00) | 0.93 (0.00) | 0.92 (0.01) | 0.024          |

BMI, body mass index; CVD, cardiovascular disease; SAT, abdominal subcutaneous adipose tissue; SE, standard error; SESSA, Shiga Epidemiological Study of Subclinical Atherosclerosis; TAT, abdominal total adipose tissue; VAT, abdominal visceral adipose tissue; VAT%, percentage of visceral adipose tissue; VSR, VAT-SAT ratio; WC, waist circumference; WHR, waist-to-hip ratio; WHtR, waist-to-height ratio.

Values are expressed as mean (SE). *P* values for trend were obtained using linear regression.

<sup>a</sup> Mean values were adjusted for BMI, age, daily steps, daily number of cigarettes, history of CVD, and history of liver disease.

<sup>b</sup> A total of 886 (non-drinkers, 172; 0.1–160.9 g/week, 349; 161–321.9 g/week, 195; 322–482.9 g/week, 107; ≥483 g/week, 63) men underwent measurement of hip circumferences.

**eTable 3.** Adjusted mean values<sup>a</sup> of obesity indices according to weekly alcohol consumption in 912 men aged 40–79 years without CVD history (SESSA, Shiga, Japan, 2006–2008)

|                             | Categories of weekly alcohol consumption (g/week) |             |             |             |             | Trend <i>P</i> |
|-----------------------------|---------------------------------------------------|-------------|-------------|-------------|-------------|----------------|
|                             | Non-drinkers                                      | 0.1–160.9   | 161–321.9   | 322–482.9   | ≥483        |                |
| n                           | 164                                               | 351         | 209         | 120         | 68          |                |
| VAT area (cm <sup>2</sup> ) | 108.3 (3.0)                                       | 116.6 (2.0) | 119.1 (2.6) | 127.3 (3.5) | 122.4 (4.6) | <0.001         |
| SAT area (cm <sup>2</sup> ) | 120.7 (2.4)                                       | 123.5 (1.6) | 119.8 (2.1) | 119.6 (2.8) | 113.9 (3.7) | 0.159          |
| TAT area (cm <sup>2</sup> ) | 229.0 (4.2)                                       | 240.1 (2.8) | 238.9 (3.7) | 246.9 (4.8) | 236.3 (6.4) | 0.070          |
| VAT%                        | 47.5 (0.7)                                        | 48.1 (0.5)  | 49.4 (0.6)  | 51.2 (0.8)  | 51.6 (1.1)  | <0.001         |
| VSR                         | 0.96 (0.03)                                       | 0.99 (0.02) | 1.03 (0.03) | 1.13 (0.03) | 1.14 (0.05) | <0.001         |
| WC (cm)                     | 84.4 (0.3)                                        | 85.3 (0.2)  | 85.8 (0.3)  | 85.3 (0.4)  | 85.4 (0.5)  | 0.029          |
| WHtR                        | 0.51 (0.00)                                       | 0.51 (0.00) | 0.52 (0.00) | 0.51 (0.00) | 0.51 (0.00) | 0.007          |
| WHR <sup>b</sup>            | 0.91 (0.00)                                       | 0.92 (0.00) | 0.93 (0.00) | 0.93 (0.00) | 0.92 (0.00) | 0.015          |

BMI, body mass index; CVD, cardiovascular disease; SAT, abdominal subcutaneous adipose tissue; SE, standard error; SESSA, Shiga Epidemiological Study of Subclinical Atherosclerosis; TAT, abdominal total adipose tissue; VAT, abdominal visceral adipose tissue; VAT%, percentage of visceral adipose tissue; VSR, VAT-SAT ratio; WC, waist circumference; WHR, waist-to-hip ratio; WHtR, waist-to-height ratio.

Values are expressed as mean (SE). *P* values for trend were obtained using linear regression.

<sup>a</sup> Mean values were adjusted using analysis of covariance for BMI, age, daily steps, daily number of cigarettes, and history of liver disease.

<sup>b</sup> A total of 867 (non-drinkers, 156; 0.1–160.9 g/week, 341; 161–321.9 g/week, 197; 322–482.9 g/week, 110; ≥483 g/week, 63) men underwent measurement of hip circumferences.
